# Supplementary material for: Age-dependent stress response DNA demethylation and gene upregulation accompany nuclear and skeletal muscle remodeling following acute resistance-type exercise in rats
Source: Atypon-hosted journal article supplement (doi:10.1139/facets-2019-0060), 2020-01-01
Supplement: facets-2019-0060_supplement1.pdf [file facets-2019-0060_supplement1.pdf]

Maximal isometric tetanus assessed and SSC protocol administered to left dorsiflexors of young and old rats.

$N = 30$  per age group

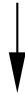

Maximal isometric tetanus assessed for left dorsiflexors at either 6, 24, 48, 72, or 120 hours post SSC exposure. At each time point, right (non-exposed) and left (SSC-exposed) tibialis anterior muscles removed for analysis.

$N = 6$  per age group at each time point

Figure S1. Study design

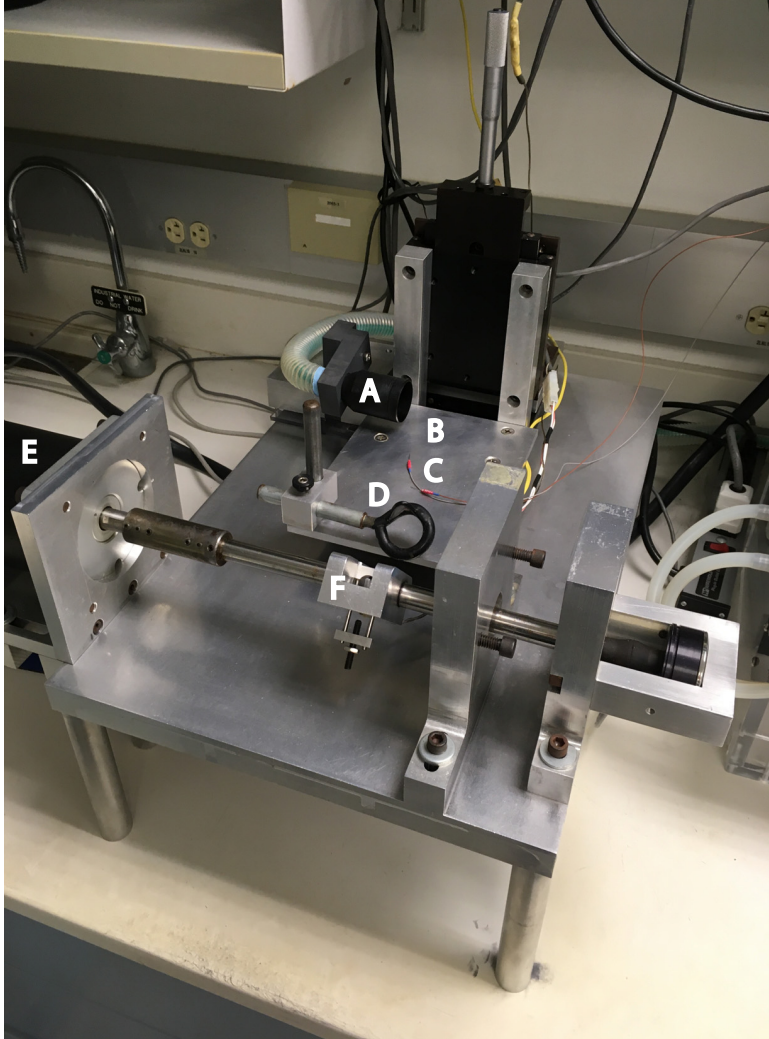

Figure S2. Apparatus for SSC exposure. (A) Anesthesia nose cone, (B) heated table, (C) platinum needle electrodes, (D) knee holder, (E) servomotor and (F) fixture with load cell to secure foot are noted.

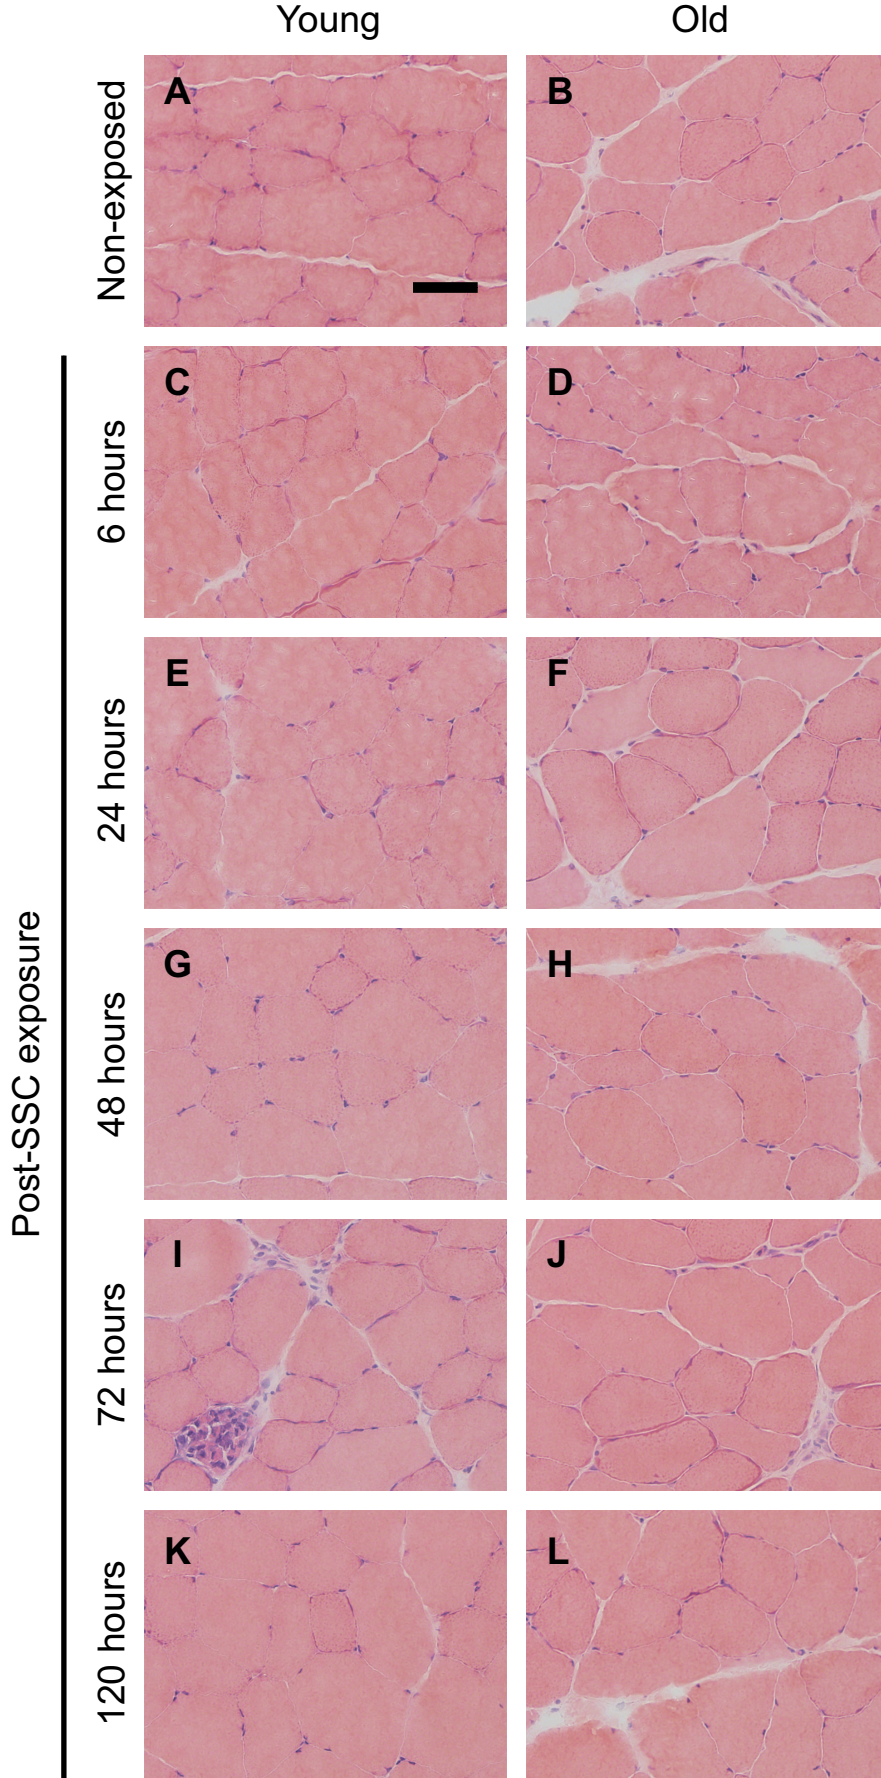

Figure S3. Hematoxylin and eosin stained muscle sections from non-exposed (A,B) and SSC-exposed muscles (C-L) of young and old rats. 40x magnification. Scale bar = 50  $\mu\text{m}$ .



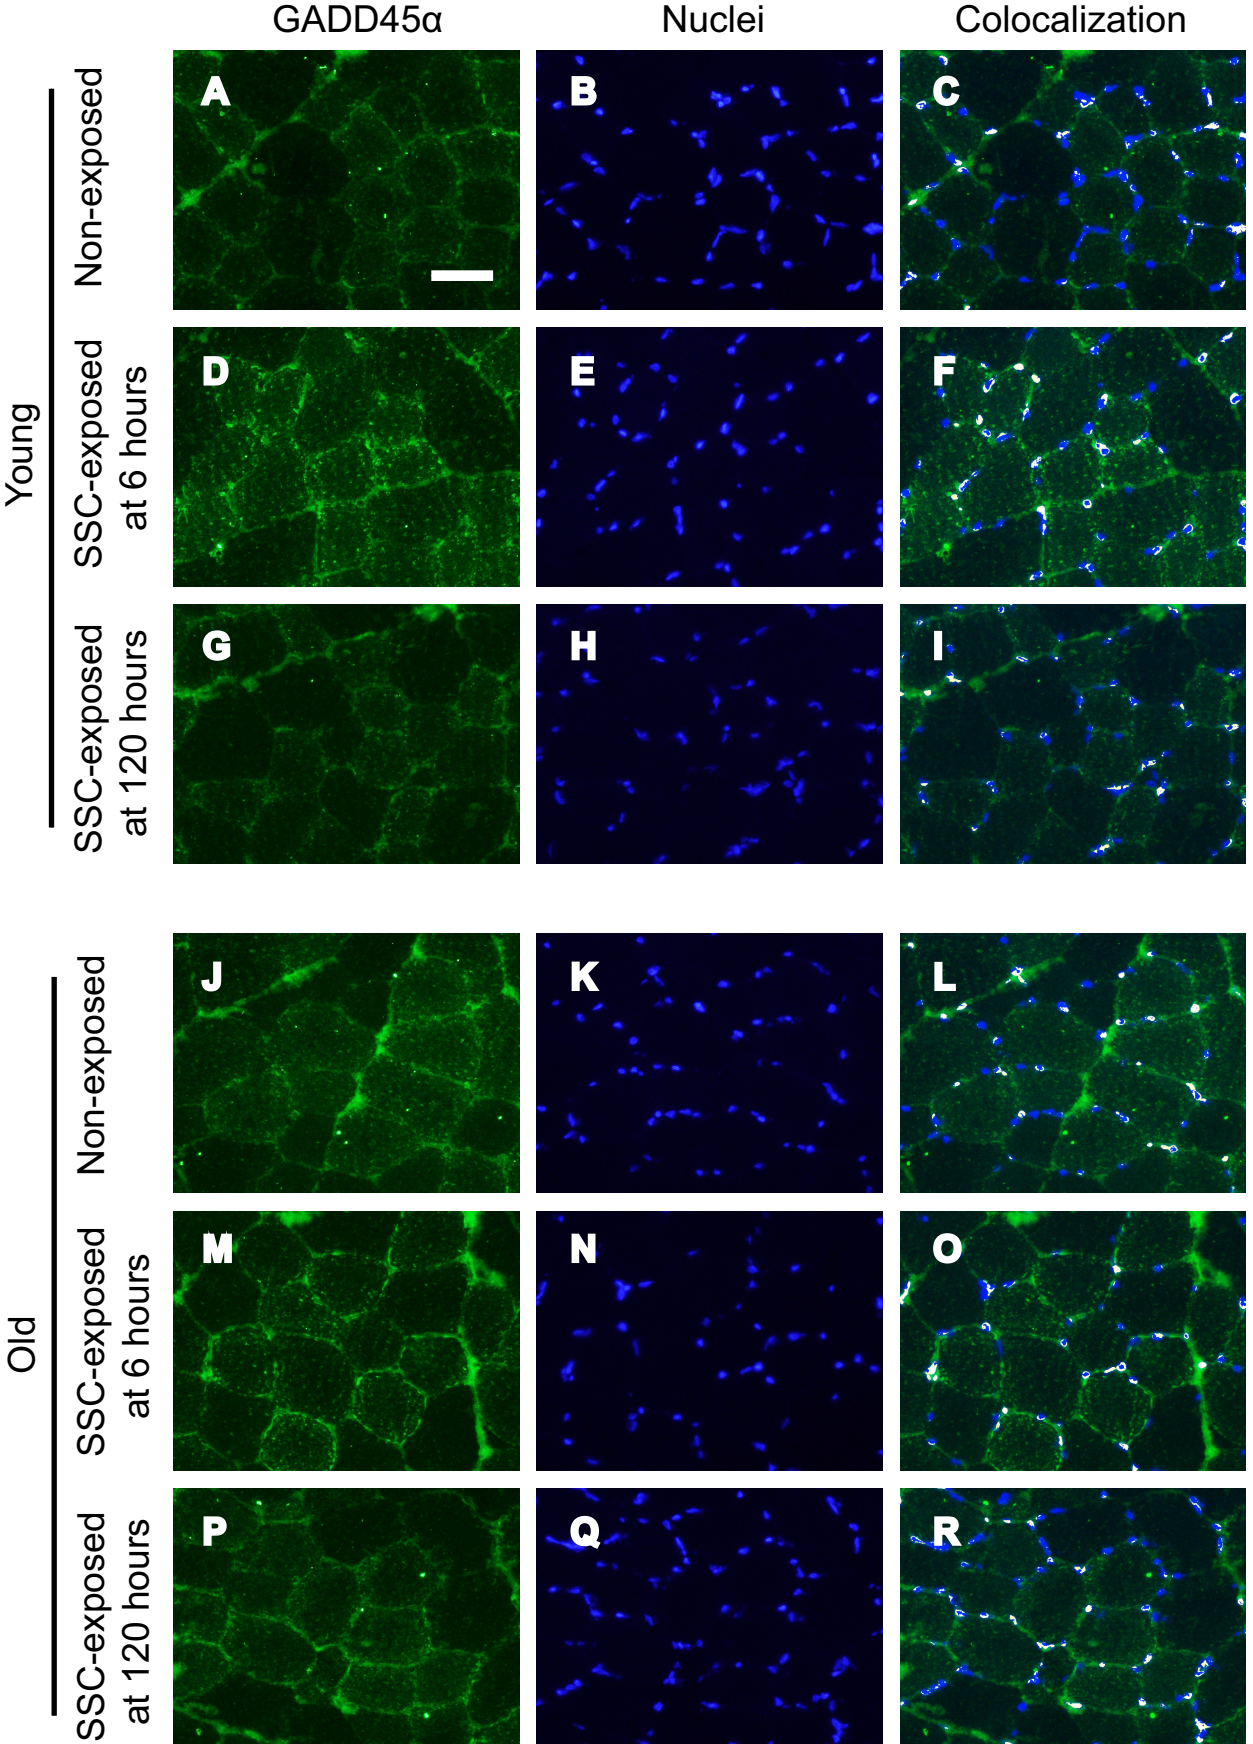

Figure S4. GADD45 $\alpha$  (green) and nuclei (blue) were identified by immunofluorescence. Colocalization (light yellow) was determined utilizing ImageJ. Images depicted are for non-exposed and SSC-exposed muscles of young (A-I) and old (J-R) rats. 40x magnification. Scale bar = 50  $\mu$ m.

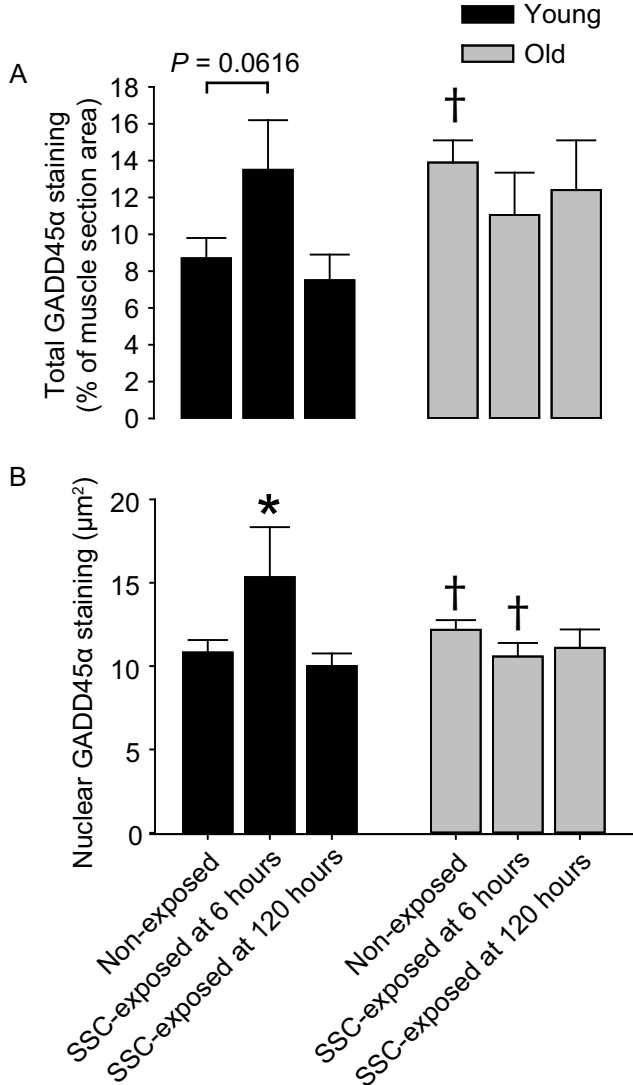

Figure S5. Increased area of nuclear GADD45 $\alpha$  immunostaining at 6 hours post SSC exposure exclusively at young age. (A) Total GADD45 $\alpha$  staining was determined by assessing the GADD45 $\alpha$  distribution over the entire muscle section area evaluated. (B) Nuclear GADD45 $\alpha$  staining represents the typical particle size (in terms of area) of colocalized GADD45 $\alpha$  and DAPI staining. Sample sizes were N = 5 to 11 per group. \*Value for SSC-exposed muscles distinct from non-exposed value, †Value for old different from value from young,  $P < 0.05$ .

|          | RefSeq       | Non-exposed old v young |           | SSC-exposed young vs non-exposed young |           |             |           | SSC-exposed old vs non-exposed old |           |             |           |
|----------|--------------|-------------------------|-----------|----------------------------------------|-----------|-------------|-----------|------------------------------------|-----------|-------------|-----------|
|          |              | Fold change             | P value   | 6 hours                                |           | 120 hours   |           | 6 hours                            |           | 120 hours   |           |
|          |              |                         |           | Fold change                            | P value   | Fold change | P value   | Fold change                        | P value   | Fold change | P value   |
| Adar     | NM_031006    | 1.015                   | 0.3495863 | 1.213                                  | 0.2140539 | 2.129       | 0.0451882 | 1.591                              | 0.3496899 | 1.680       | 0.2651865 |
| Akt1     | NM_033230    | 1.029                   | 0.3156168 | 1.127                                  | 0.3472970 | 1.312       | 0.2608956 | 1.600                              | 0.7981331 | 1.200       | 0.7938643 |
| Akt2     | NM_017093    | 0.800                   | 0.4636373 | 1.177                                  | 0.2729661 | 1.152       | 0.4216094 | 1.846                              | 0.7849050 | 1.573       | 0.9314246 |
| Akt3     | NM_031575    | 0.753                   | 0.8450449 | 1.014                                  | 0.7957626 | 2.165       | 0.0744891 | 1.432                              | 0.6410061 | 1.693       | 0.3076758 |
| Apc      | NM_012499    | 0.675                   | 0.9422761 | 1.947                                  | 0.0095230 | 1.332       | 0.2827003 | 3.073                              | 0.0097984 | 1.673       | 0.6062752 |
| Bad      | NM_022698    | 1.021                   | 0.2312555 | 1.032                                  | 0.8933062 | 1.944       | 0.0128060 | 1.617                              | 0.7935037 | 1.486       | 0.8943071 |
| Btk      | NM_001007798 | 1.088                   | 0.8068535 | 1.309                                  | 0.9634360 | 2.965       | 0.0699993 | 1.940                              | 0.0394869 | 1.643       | 0.2523489 |
| Casp9    | NM_031632    | 1.219                   | 0.5196473 | 1.001                                  | 0.6711187 | 2.114       | 0.0318192 | 1.356                              | 0.5889438 | 1.860       | 0.1071210 |
| Ccnd1    | NM_171992    | 0.704                   | 0.4264880 | 2.334                                  | 0.0016842 | 1.823       | 0.0593948 | 2.175                              | 0.0269519 | 1.660       | 0.1915375 |
| Cd14     | NM_021744    | 1.376                   | 0.2886580 | 6.840                                  | 0.0000011 | 7.281       | 0.0126005 | 5.842                              | 0.0000621 | 2.209       | 0.0939831 |
| Cdc42    | NM_171994    | 1.019                   | 0.2710694 | 0.948                                  | 0.5879353 | 1.492       | 0.3067583 | 1.556                              | 0.6737300 | 1.279       | 0.9412692 |
| Cdkn1b   | NM_031762    | 0.640                   | 0.9715605 | 0.706                                  | 0.0654720 | 1.274       | 0.2683920 | 1.222                              | 0.4880503 | 1.496       | 0.9688465 |
| Chuk     | NM_001107588 | 0.802                   | 0.9270856 | 1.230                                  | 0.1485784 | 1.346       | 0.3096390 | 1.539                              | 0.4506987 | 1.403       | 0.7080145 |
| Csnk2a1  | NM_053824    | 0.835                   | 0.6351494 | 0.989                                  | 0.8006326 | 1.162       | 0.4269725 | 1.378                              | 0.9460552 | 1.375       | 0.9708412 |
| Cttnb1   | NM_053357    | 0.813                   | 0.8051577 | 1.288                                  | 0.1097575 | 1.167       | 0.3788654 | 1.559                              | 0.4936785 | 1.242       | 0.9028892 |
| Eif2ak2  | NM_019335    | 0.945                   | 0.4022980 | 1.007                                  | 0.8688934 | 2.038       | 0.0947184 | 1.385                              | 0.9175409 | 1.572       | 0.5150396 |
| Eif4b    | NM_001008324 | 1.015                   | 0.3158502 | 1.110                                  | 0.3425637 | 1.343       | 0.2020257 | 1.432                              | 0.8927313 | 1.300       | 0.8988173 |
| Eif4e    | NM_053974    | 0.688                   | 0.7929727 | 1.640                                  | 0.0032265 | 1.253       | 0.2785900 | 2.710                              | 0.0123119 | 1.752       | 0.5341397 |
| Eif4ebp1 | NM_053877    | 0.967                   | 0.3548784 | 0.967                                  | 0.7058059 | 1.157       | 0.4846034 | 1.613                              | 0.5612211 | 0.828       | 0.1124903 |
| Eif4g1   | XM_213569    | 0.697                   | 0.8048950 | 1.190                                  | 0.3170623 | 0.931       | 0.9524830 | 1.466                              | 0.9669034 | 1.501       | 0.9035472 |
| Faslg    | NM_012908    | 0.906                   | 0.6396818 | 1.083                                  | 0.7293083 | 1.459       | 0.6127891 | 2.371                              | 0.0217117 | 1.775       | 0.2160576 |
| Fkbp1a   | NM_013102    | 0.999                   | 0.1908073 | 1.215                                  | 0.0945746 | 1.776       | 0.2270288 | 1.799                              | 0.5922017 | 1.419       | 0.7679125 |
| Fos      | NM_022197    | 1.130                   | 0.4292572 | 59.513                                 | 0.0003550 | 4.189       | 0.0049911 | 45.132                             | 0.0000115 | 3.149       | 0.0993781 |
| Foxp1    | NM_012560    | 0.906                   | 0.6396818 | 1.083                                  | 0.7293083 | 1.279       | 0.7215567 | 2.189                              | 0.0427560 | 1.348       | 0.4356419 |
| Foxo3    | NM_001106395 | 0.689                   | 0.8591063 | 1.613                                  | 0.0307167 | 1.119       | 0.4790210 | 1.636                              | 0.5474143 | 1.219       | 0.7466365 |
| Gja1     | NM_012567    | 0.566                   | 0.2868805 | 2.892                                  | 0.0008940 | 2.215       | 0.0073391 | 3.231                              | 0.0038150 | 1.752       | 0.3483811 |
| Grb10    | NM_001109093 | 0.491                   | 0.1512955 | 1.293                                  | 0.0965195 | 1.179       | 0.2215028 | 1.961                              | 0.2184294 | 1.756       | 0.3598679 |
| Grb2     | NM_030846    | 0.866                   | 0.5744967 | 1.197                                  | 0.0227951 | 1.449       | 0.1746431 | 1.690                              | 0.3823727 | 1.337       | 0.9957924 |
| Gsk3b    | NM_032080    | 0.922                   | 0.4583695 | 1.488                                  | 0.0177783 | 1.489       | 0.1612928 | 2.232                              | 0.0232965 | 1.381       | 0.7903769 |
| Hras     | NM_001098241 | 0.560                   | 0.1563668 | 0.939                                  | 0.5327527 | 0.842       | 0.3375776 | 1.502                              | 0.4539323 | 1.229       | 0.8266386 |
| Hspb1    | NM_031970    | 1.960                   | 0.0372317 | 21.060                                 | 0.0000129 | 2.488       | 0.0013772 | 13.920                             | 0.0000192 | 0.878       | 0.2202804 |
| Igf1     | NM_178866    | 0.566                   | 0.1536754 | 1.010                                  | 0.9836749 | 2.653       | 0.0162585 | 1.334                              | 0.6490396 | 1.718       | 0.2046425 |
| Igf1r    | NM_052807    | 0.892                   | 0.5795476 | 1.092                                  | 0.5843022 | 1.647       | 0.0777363 | 1.433                              | 0.9647770 | 1.450       | 0.9268054 |
| Ilk      | NM_133409    | 0.959                   | 0.2293459 | 1.088                                  | 0.3595940 | 2.217       | 0.0343196 | 1.419                              | 0.9307417 | 1.499       | 0.8740400 |
| Irak1    | NM_001127555 | 1.221                   | 0.1428188 | 1.067                                  | 0.4267540 | 1.411       | 0.2073787 | 1.275                              | 0.9628969 | 1.062       | 0.5220114 |
| Irs1     | NM_012969    | 0.414                   | 0.0445857 | 0.977                                  | 0.8222718 | 0.727       | 0.1040792 | 1.475                              | 0.7121904 | 1.374       | 0.9971753 |
| Itgbl1   | NM_017022    | 0.893                   | 0.7046180 | 1.870                                  | 0.0088448 | 2.344       | 0.0344661 | 2.602                              | 0.0068666 | 1.741       | 0.1018678 |
| Jun      | NM_021835    | 1.804                   | 0.0837010 | 3.168                                  | 0.0053881 | 1.649       | 0.2329077 | 2.443                              | 0.0107815 | 1.211       | 0.7577129 |
| Kcnh8    | NM_145095    | 0.906                   | 0.6396818 | 1.083                                  | 0.7293083 | 1.238       | 0.7475094 | 2.189                              | 0.0427560 | 1.348       | 0.4356419 |
| Map2k1   | NM_031643    | 1.256                   | 0.2284148 | 1.359                                  | 0.0673604 | 1.027       | 0.4911515 | 1.702                              | 0.1684608 | 0.931       | 0.5745796 |
| Mapk1    | NM_053842    | 1.163                   | 0.3241351 | 0.793                                  | 0.1303443 | 1.203       | 0.4122577 | 1.151                              | 0.8729717 | 1.057       | 0.8867484 |
| Mapk14   | NM_031020    | 0.839                   | 0.6537029 | 0.899                                  | 0.7384171 | 0.694       | 0.2686090 | 1.191                              | 0.7309275 | 0.923       | 0.4151131 |
| Mapk3    | NM_017347    | 1.346                   | 0.2034205 | 0.903                                  | 0.7140912 | 1.761       | 0.0813878 | 1.064                              | 0.9867548 | 1.126       | 0.7547294 |
| Mapk8    | XM_341399    | 1.045                   | 0.5629154 | 1.649                                  | 0.0620716 | 1.444       | 0.2544273 | 1.371                              | 0.5460163 | 1.079       | 0.8761154 |
| Mtgp1    | XM_001070795 | 1.046                   | 0.6706387 | 0.729                                  | 0.0239590 | 0.720       | 0.3918778 | 0.858                              | 0.3192227 | 1.073       | 0.6051408 |
| Mtor     | NM_019906    | 1.362                   | 0.1206530 | 0.916                                  | 0.8712264 | 1.302       | 0.3085324 | 1.008                              | 0.7654862 | 0.907       | 0.4675876 |
| Myd88    | NM_198130    | 1.251                   | 0.3110766 | 3.032                                  | 0.0000573 | 2.099       | 0.0253565 | 2.488                              | 0.0018026 | 1.072       | 0.8593460 |
| Nfkb1    | XM_342346    | 1.140                   | 0.4497781 | 2.085                                  | 0.0122810 | 1.103       | 0.4254764 | 1.819                              | 0.0468586 | 0.966       | 0.9731361 |
| Nfkbia   | NM_001105720 | 1.418                   | 0.1621948 | 1.326                                  | 0.2872309 | 1.691       | 0.1220222 | 1.019                              | 0.9709138 | 1.037       | 0.7083479 |
| Pabpc1   | NM_134353    | 1.848                   | 0.0273988 | 2.313                                  | 0.0000601 | 3.208       | 0.0380829 | 1.326                              | 0.2919038 | 1.151       | 0.5931786 |
| Pak1     | NM_017198    | 3.146                   | 0.0000837 | 1.130                                  | 0.2873416 | 5.353       | 0.0031378 | 0.903                              | 0.6015207 | 1.836       | 0.0448578 |
| Pdgfra   | NM_012802    | 0.964                   | 0.9636219 | 2.728                                  | 0.0024529 | 2.775       | 0.0076434 | 1.864                              | 0.0559812 | 1.364       | 0.3728045 |
| Pdk1     | NM_053826    | 1.055                   | 0.5830082 | 0.888                                  | 0.6161716 | 1.054       | 0.5685395 | 1.030                              | 0.9886646 | 0.976       | 0.9330220 |
| Pdk2     | NM_030872    | 1.006                   | 0.8291810 | 0.878                                  | 0.4414970 | 0.830       | 0.7350327 | 1.094                              | 0.6614284 | 0.805       | 0.3799998 |
| Pdpk1    | NM_031081    | 1.337                   | 0.1756123 | 1.408                                  | 0.0365262 | 1.234       | 0.3852514 | 1.380                              | 0.2147575 | 0.868       | 0.3922856 |
| Pik3ca   | NM_133399    | 1.213                   | 0.2900169 | 1.412                                  | 0.0629710 | 1.364       | 0.2434653 | 1.354                              | 0.1674438 | 1.042       | 0.9797867 |
| Pik3cg   | NM_001106723 | 1.569                   | 0.3989113 | 1.127                                  | 0.9340903 | 4.358       | 0.0196743 | 1.451                              | 0.1423597 | 1.588       | 0.0703731 |
| Pik3r1   | NM_013005    | 1.644                   | 0.0448065 | 0.668                                  | 0.0359715 | 1.437       | 0.2640307 | 0.571                              | 0.0387254 | 0.905       | 0.6348700 |
| Pik3r2   | NM_022185    | 1.017                   | 0.7332350 | 0.540                                  | 0.0034340 | 1.179       | 0.3140043 | 0.815                              | 0.2555928 | 1.081       | 0.8683149 |
| Prkca    | NM_001105713 | 0.892                   | 0.5489238 | 1.040                                  | 0.6295525 | 0.899       | 0.9929308 | 1.013                              | 0.9546605 | 0.859       | 0.4234501 |
| Prkcb    | NM_012713    | 1.481                   | 0.5058358 | 1.226                                  | 0.9554543 | 3.817       | 0.0195367 | 1.380                              | 0.1071964 | 1.983       | 0.0500448 |
| Prkcz    | NM_022507    | 1.672                   | 0.0571137 | 0.934                                  | 0.5136579 | 0.872       | 0.8635523 | 1.082                              | 0.8344702 | 1.120       | 0.5762354 |
| Pten     | NM_031606    | 1.283                   | 0.1217087 | 0.902                                  | 0.6367995 | 1.381       | 0.2185142 | 0.823                              | 0.2506749 | 0.981       | 0.9681199 |
| Ptk2     | NM_013081    | 1.305                   | 0.1387679 | 0.929                                  | 0.9261132 | 1.247       | 0.2675518 | 0.861                              | 0.3904491 | 0.841       | 0.3813059 |
| Ptpn11   | NM_013088    | 0.883                   | 0.5882587 | 1.100                                  | 0.3372715 | 0.812       | 0.7813010 | 1.063                              | 0.8445279 | 0.835       | 0.3260876 |
| Rac1     | NM_134366    | 1.299                   | 0.0410298 | 1.136                                  | 0.0876750 | 1.179       | 0.3638345 | 0.962                              | 0.6802820 | 0.771       | 0.8390962 |
| Raf1     | NM_012639    | 1.227                   | 0.1873535 | 1.053                                  | 0.6111353 | 1.144       | 0.4299225 | 0.969                              | 0.6887957 | 0.864       | 0.3145820 |
| Rasa1    | NM_013135    | 1.229                   | 0.1679196 | 1.029                                  | 0.6845863 | 1.660       | 0.1301727 | 1.059                              | 0.7300314 | 1.079       | 0.6487772 |
| Rbl2     | NM_031094    | 1.170                   | 0.1921933 | 0.710                                  | 0.0785628 | 1.296       | 0.2522845 | 0.803                              | 0.1394871 | 0.986       | 0.9582353 |
| Rheb     | NM_013216    | 1.314                   | 0.0500674 | 1.079                                  | 0.3872607 | 1.161       | 0.4381648 | 1.010                              | 0.9677144 | 0.785       | 0.3267656 |
| Rhoa     | NM_057132    | 1.981                   | 0.0019808 | 1.295                                  | 0.0233357 | 2.114       | 0.1654996 | 1.106                              | 0.5659846 | 0.844       | 0.4014363 |
| Rps6ka1  | NM_031107    | 1.725                   | 0.2439544 | 1.140                                  | 0.9541408 | 2.058       | 0.1535088 | 1.096                              | 0.7926545 | 1.387       | 0.2296831 |
| Rps6kb1  | NM_031985    | 1.167                   | 0.2245281 | 0.946                                  | 0.4926042 | 1.431       | 0.2423899 | 0.816                              | 0.3707313 | 0.921       | 0.6337674 |
| Shc1     | NM_053517    | 1.999                   | 0.0270380 | 0.887                                  | 0.5957245 | 2.056       | 0.1258262 | 0.891                              | 0.4866495 | 0.911       | 0.5829368 |
| Sos1     | NM_001100716 | 1.434                   | 0.0459079 | 0.990                                  | 0.9457741 | 1.297       | 0.3099740 | 0.834                              | 0.2369358 | 0.862       | 0.5189351 |
| Srf      | NM_001109302 | 0.950                   | 0.9627303 | 1.073                                  | 0.4520754 | 1.004       | 0.8246521 | 1.069                              | 0.8855601 | 1.018       | 0.9255043 |
| Tcl1a    | NM_001109601 | 0.906                   | 0.6396818 | 1.083                                  | 0.7293083 | 1.238       | 0.7475094 | 2.189                              | 0.0427560 | 1.348       | 0.4356419 |
| Tirap    | XM_001055833 | 1.027                   | 0.7100951 | 0.958                                  | 0.7970259 | 1.162       | 0.3902702 | 0.997                              | 0.8158010 | 1.242       | 0.5342038 |
| Tir4     | NM_019178    | 1.058                   | 0.8155293 | 1.155                                  | 0.5503378 | 3.403       | 0.0016578 | 1.200                              | 0.3978932 | 1.717       | 0.0257253 |
| Tollip   | NM_001109668 | 1.233                   | 0.3364909 | 1.991                                  | 0.0083446 | 1.099       | 0.3826275 | 2.162                              | 0.0570199 | 1.031       | 0.7986860 |
| Tsc1     | NM_021854    | 0.935                   | 0.9654909 | 1.091                                  | 0.5008206 | 1.323       | 0.1257079 | 1.265                              | 0.4074346 | 1.449       | 0.1485628 |
| Tsc2     | NM_012680    | 1.294                   | 0.1658883 | 0.818                                  | 0.2194138 | 1.309       | 0.3045317 | 0.977                              | 0.6055270 | 0.773       | 0.1735883 |
| Wasl     | NM_001110365 | 1.126                   | 0.4675927 | 0.839                                  | 0.1886795 | 1.192       | 0.3179934 | 0.790                              | 0.3047494 | 0.7         |           |

|                  | RefSeq       | Non-exposed old v young |           | SSC-exposed young vs non-exposed young |           |             |           | SSC-exposed old vs non-exposed old |           |             |           |
|------------------|--------------|-------------------------|-----------|----------------------------------------|-----------|-------------|-----------|------------------------------------|-----------|-------------|-----------|
|                  |              | Fold change             | P value   | 6 hours                                |           | 120 hours   |           | 6 hours                            |           | 120 hours   |           |
|                  |              |                         |           | Fold change                            | P value   | Fold change | P value   | Fold change                        | P value   | Fold change | P value   |
| <i>Abi1</i>      | NM_001100850 | 2.031                   | 0.0177477 | 1.186                                  | 0.7295228 | 2.244       | 0.0215134 | 0.825                              | 0.3657595 | 0.709       | 0.2154338 |
| <i>Alfm1</i>     | NM_031356    | 1.792                   | 0.0013938 | 0.869                                  | 0.6427884 | 1.174       | 0.5747515 | 1.065                              | 0.4809139 | 0.838       | 0.7110971 |
| <i>Akt1</i>      | NM_032320    | 1.693                   | 0.0268518 | 1.022                                  | 0.9295767 | 1.153       | 0.5904114 | 0.827                              | 0.3623520 | 0.628       | 0.1052727 |
| <i>Anxa5</i>     | NM_013132    | 1.306                   | 0.0745319 | 3.452                                  | 0.0000010 | 3.758       | 0.0064663 | 2.583                              | 0.0004240 | 1.088       | 0.6953660 |
| <i>Apa1</i>      | NM_023979    | 1.457                   | 0.0583125 | 0.825                                  | 0.2987440 | 1.481       | 0.0552714 | 0.828                              | 0.4664720 | 1.021       | 0.7307932 |
| <i>Api5</i>      | NM_001127379 | 1.759                   | 0.0031277 | 1.110                                  | 0.7878462 | 1.376       | 0.1992333 | 0.909                              | 0.4650617 | 0.659       | 0.0104310 |
| <i>Aven</i>      | NM_001107757 | 1.212                   | 0.1846125 | 1.071                                  | 0.7434076 | 1.233       | 0.2592970 | 1.012                              | 0.8912326 | 0.756       | 0.1438748 |
| <i>Bad</i>       | NM_022698    | 1.740                   | 0.0038161 | 0.953                                  | 0.9207381 | 1.988       | 0.0051930 | 0.915                              | 0.4492341 | 0.942       | 0.6253378 |
| <i>Bag1</i>      | NM_001106647 | 1.998                   | 0.0055575 | 1.076                                  | 0.5339545 | 1.173       | 0.1754192 | 0.963                              | 0.7626300 | 0.661       | 0.1792170 |
| <i>Bak1</i>      | NM_053812    | 1.862                   | 0.0209772 | 2.000                                  | 0.0105576 | 2.219       | 0.0235043 | 1.064                              | 0.8526216 | 0.828       | 0.4982403 |
| <i>Bax</i>       | NM_017059    | 2.188                   | 0.0061274 | 1.670                                  | 0.0577202 | 1.754       | 0.0643708 | 0.871                              | 0.5146831 | 0.763       | 0.2529597 |
| <i>Bcl10</i>     | NM_031328    | 1.486                   | 0.1025074 | 2.274                                  | 0.0052386 | 1.825       | 0.0449628 | 1.513                              | 0.0390027 | 0.844       | 0.3104047 |
| <i>Bcl2</i>      | NM_016993    | 1.063                   | 0.8875873 | 1.091                                  | 0.9816859 | 1.104       | 0.9277011 | 1.168                              | 0.6703366 | 1.361       | 0.3098574 |
| <i>Bcl2a1d</i>   | NM_133416    | 1.373                   | 0.3454260 | 3.514                                  | 0.0057437 | 6.668       | 0.0492813 | 3.661                              | 0.0026835 | 2.551       | 0.0351819 |
| <i>Bcl2l1</i>    | NM_031535    | 2.080                   | 0.0027187 | 1.379                                  | 0.2424814 | 1.588       | 0.0950983 | 0.915                              | 0.6069811 | 0.622       | 0.0458886 |
| <i>Bcl2l11</i>   | NM_022612    | 1.103                   | 0.8426040 | 1.600                                  | 0.4979579 | 0.639       | 0.3114931 | 1.267                              | 0.9882336 | 1.139       | 0.4177509 |
| <i>Bcl2l2</i>    | NM_021850    | 1.200                   | 0.9236909 | 0.570                                  | 0.4261813 | 1.522       | 0.7536859 | 0.665                              | 0.1422809 | 1.771       | 0.0319606 |
| <i>Bid</i>       | NM_022684    | 2.784                   | 0.0002698 | 1.916                                  | 0.0288683 | 2.848       | 0.0087131 | 0.860                              | 0.3114485 | 1.395       | 0.1091426 |
| <i>Bik</i>       | NM_053704    | 1.103                   | 0.8426040 | 0.976                                  | 0.8519256 | 0.639       | 0.3114931 | 0.953                              | 0.7106299 | 1.184       | 0.4112400 |
| <i>Birc2</i>     | NM_021752    | 1.435                   | 0.0084601 | 2.795                                  | 0.0011112 | 1.262       | 0.1971361 | 1.754                              | 0.0004277 | 0.650       | 0.0058271 |
| <i>Birc3</i>     | NM_023987    | 2.213                   | 0.0027338 | 2.648                                  | 0.0002437 | 1.984       | 0.0126729 | 1.811                              | 0.0087381 | 1.019       | 0.5719615 |
| <i>Birc5</i>     | NM_022274    | 1.103                   | 0.8426040 | 0.976                                  | 0.8519256 | 0.693       | 0.3547614 | 0.953                              | 0.7106299 | 1.127       | 0.4193053 |
| <i>Bnip2</i>     | NM_001106835 | 1.395                   | 0.0299183 | 0.993                                  | 0.9167782 | 1.053       | 0.8358938 | 0.882                              | 0.3376587 | 0.666       | 0.0225505 |
| <i>Bnip3</i>     | NM_053420    | 1.407                   | 0.0401083 | 1.032                                  | 0.9669121 | 1.204       | 0.4713471 | 0.981                              | 0.8549101 | 0.753       | 0.0161760 |
| <i>Bok</i>       | NM_017312    | 1.026                   | 0.7940138 | 1.189                                  | 0.7411083 | 2.026       | 0.0707746 | 0.754                              | 0.4669167 | 1.493       | 0.3449364 |
| <i>Card10</i>    | NM_001130554 | 0.987                   | 0.7394952 | 1.005                                  | 0.9256599 | 0.895       | 0.5785815 | 0.801                              | 0.3146368 | 1.377       | 0.2579542 |
| <i>Casp1</i>     | NM_012762    | 1.765                   | 0.0577559 | 1.783                                  | 0.1495159 | 2.695       | 0.0353331 | 1.511                              | 0.0559720 | 1.265       | 0.1891190 |
| <i>Casp12</i>    | NM_130422    | 1.645                   | 0.0010469 | 0.703                                  | 0.0188978 | 1.595       | 0.0365874 | 0.809                              | 0.2784627 | 1.289       | 0.1618769 |
| <i>Casp14</i>    | XM_234878    | 1.103                   | 0.8426040 | 0.976                                  | 0.8519256 | 0.639       | 0.3114931 | 0.953                              | 0.7106299 | 1.127       | 0.4193053 |
| <i>Casp2</i>     | NM_022522    | 1.193                   | 0.2858350 | 0.643                                  | 0.0521231 | 1.531       | 0.0775077 | 0.589                              | 0.0239317 | 1.186       | 0.3684708 |
| <i>Casp3</i>     | NM_012922    | 1.401                   | 0.1310393 | 3.477                                  | 0.0001768 | 2.554       | 0.0243746 | 2.365                              | 0.0053906 | 1.137       | 0.6675562 |
| <i>Casp4</i>     | NM_053736    | 1.600                   | 0.0002537 | 0.978                                  | 0.7891731 | 1.817       | 0.0578560 | 0.922                              | 0.8740963 | 0.994       | 0.7970816 |
| <i>Casp6</i>     | NM_031775    | 1.148                   | 0.3027243 | 0.979                                  | 0.8362135 | 2.840       | 0.0057881 | 0.872                              | 0.5375216 | 1.460       | 0.2196072 |
| <i>Casp7</i>     | NM_022260    | 1.216                   | 0.4659333 | 0.847                                  | 0.6365750 | 1.122       | 0.8404701 | 1.010                              | 0.9095362 | 1.020       | 0.9184631 |
| <i>Casp8</i>     | NM_022277    | 1.139                   | 0.6618228 | 1.056                                  | 0.9633907 | 1.500       | 0.2629580 | 0.772                              | 0.4598854 | 1.412       | 0.3008877 |
| <i>Casp8ap2</i>  | NM_001107921 | 1.569                   | 0.0023272 | 1.140                                  | 0.2562916 | 1.243       | 0.1345891 | 0.800                              | 0.3165590 | 0.934       | 0.9832853 |
| <i>Casp9</i>     | NM_031632    | 1.389                   | 0.1659442 | 0.914                                  | 0.6844373 | 1.267       | 0.3695355 | 0.541                              | 0.0712295 | 1.225       | 0.3849312 |
| <i>Cd40</i>      | NM_134360    | 1.018                   | 0.8680653 | 1.131                                  | 0.9411074 | 1.061       | 0.9253113 | 1.100                              | 0.8548994 | 1.799       | 0.2610094 |
| <i>Cd40lg</i>    | NM_053353    | 1.103                   | 0.8426040 | 0.976                                  | 0.8519256 | 0.639       | 0.3114931 | 0.953                              | 0.7106299 | 1.168       | 0.4135119 |
| <i>Cflar</i>     | NM_057138    | 1.619                   | 0.0050765 | 1.578                                  | 0.0251148 | 1.337       | 0.1547765 | 1.101                              | 0.4886321 | 0.866       | 0.4451756 |
| <i>Cidea</i>     | NM_001170467 | 5.769                   | 0.0085289 | 0.875                                  | 0.7748849 | 1.942       | 0.1429739 | 0.634                              | 0.3087657 | 0.928       | 0.6239308 |
| <i>Cideb</i>     | NM_001108869 | 1.024                   | 0.9024313 | 1.200                                  | 0.9165045 | 0.728       | 0.4010196 | 1.000                              | 0.7593547 | 1.458       | 0.3514201 |
| <i>Cy5c</i>      | NM_012839    | 1.370                   | 0.1509402 | 1.234                                  | 0.4931549 | 0.830       | 0.3673580 | 1.226                              | 0.0765290 | 0.784       | 0.3949348 |
| <i>Dadd1</i>     | NM_138910    | 1.719                   | 0.0124780 | 1.027                                  | 0.7842158 | 1.416       | 0.0751706 | 1.094                              | 0.7592268 | 0.813       | 0.6226660 |
| <i>Dapk1</i>     | NM_001107335 | 0.642                   | 0.1629473 | 0.344                                  | 0.0549804 | 0.610       | 0.1751841 | 0.402                              | 0.0616076 | 0.995       | 0.8067767 |
| <i>Dffa</i>      | NM_053679    | 0.899                   | 0.4713389 | 0.623                                  | 0.1013463 | 1.003       | 0.8879502 | 0.690                              | 0.0680187 | 0.917       | 0.5944969 |
| <i>Dffb</i>      | NM_053362    | 1.113                   | 0.8192872 | 1.078                                  | 0.9455287 | 0.825       | 0.4692862 | 0.912                              | 0.6705871 | 1.203       | 0.4079572 |
| <i>Diablo</i>    | NM_001008292 | 1.778                   | 0.0309260 | 1.040                                  | 0.9707353 | 1.407       | 0.1756648 | 0.824                              | 0.3841218 | 0.829       | 0.4059098 |
| <i>Fadd</i>      | NM_152937    | 1.044                   | 0.9766536 | 0.893                                  | 0.4910697 | 1.262       | 0.3471362 | 0.981                              | 0.8647543 | 1.259       | 0.2374101 |
| <i>Faim</i>      | NM_080895    | 2.054                   | 0.0002074 | 1.112                                  | 0.4343309 | 2.105       | 0.0278630 | 0.788                              | 0.1535163 | 0.900       | 0.9400134 |
| <i>Fas</i>       | NM_139194    | 0.931                   | 0.9093033 | 1.021                                  | 0.9600208 | 1.049       | 0.8546611 | 1.000                              | 0.8281013 | 1.228       | 0.3971057 |
| <i>Faslg</i>     | NM_012908    | 1.114                   | 0.8333828 | 0.976                                  | 0.8519256 | 0.639       | 0.3114931 | 0.944                              | 0.7029124 | 1.811       | 0.2721801 |
| <i>Gadd45a</i>   | NM_024127    | 33.934                  | 0.0043849 | 26.471                                 | 0.000081  | 2.580       | 0.0180250 | 1.786                              | 0.2956835 | 0.521       | 0.2760925 |
| <i>Hrk</i>       | NM_057130    | 1.103                   | 0.8426040 | 0.976                                  | 0.8519256 | 0.639       | 0.3114931 | 0.953                              | 0.7106299 | 1.208       | 0.4053550 |
| <i>Il10</i>      | NM_012854    | 1.030                   | 0.7215323 | 1.783                                  | 0.0624628 | 0.884       | 0.9685639 | 1.462                              | 0.4720045 | 2.050       | 0.1503620 |
| <i>Lta</i>       | NM_080769    | 1.103                   | 0.8426040 | 0.976                                  | 0.8519256 | 0.639       | 0.3114931 | 0.953                              | 0.7106299 | 1.179       | 0.4119190 |
| <i>Ltbr</i>      | NM_001008315 | 1.164                   | 0.2950873 | 1.711                                  | 0.0049555 | 1.646       | 0.0050895 | 0.937                              | 0.6301171 | 1.185       | 0.4868120 |
| <i>Mapk1</i>     | NM_053842    | 1.220                   | 0.3023403 | 0.784                                  | 0.3067314 | 0.774       | 0.2179223 | 1.002                              | 0.8929405 | 0.732       | 0.4515007 |
| <i>Mapk8ip1</i>  | NM_053777    | 1.009                   | 0.9226539 | 0.885                                  | 0.5126220 | 0.721       | 0.1143398 | 0.938                              | 0.5109765 | 0.712       | 0.0245349 |
| <i>Mcl1</i>      | NM_021846    | 1.063                   | 0.2460024 | 1.563                                  | 0.0001276 | 1.121       | 0.1918443 | 1.302                              | 0.0377501 | 0.706       | 0.0318773 |
| <i>Naij2</i>     | XM_226742    | 1.103                   | 0.8426040 | 1.191                                  | 0.9238886 | 2.047       | 0.1665707 | 0.953                              | 0.7106299 | 1.797       | 0.2917199 |
| <i>Nfkb1</i>     | XM_342346    | 1.275                   | 0.0400524 | 2.013                                  | 0.0009646 | 1.419       | 0.0391724 | 1.552                              | 0.0065084 | 0.779       | 0.5168242 |
| <i>No13</i>      | NM_053516    | 1.911                   | 0.0022463 | 0.903                                  | 0.3924539 | 1.516       | 0.0030619 | 0.855                              | 0.3667156 | 0.700       | 0.1080569 |
| <i>Polb</i>      | NM_017141    | 1.320                   | 0.0783345 | 0.762                                  | 0.0778230 | 1.067       | 0.5972600 | 0.876                              | 0.4446716 | 0.732       | 0.1665674 |
| <i>Prdx2</i>     | NM_017169    | 1.821                   | 0.0254643 | 0.899                                  | 0.5358978 | 1.263       | 0.0810417 | 1.000                              | 0.8623954 | 0.792       | 0.6288237 |
| <i>Prlr</i>      | NM_012630    | 1.103                   | 0.8426040 | 0.976                                  | 0.8519256 | 0.639       | 0.3114931 | 0.953                              | 0.7106299 | 1.127       | 0.4193053 |
| <i>Pycard</i>    | NM_172322    | 2.049                   | 0.0001779 | 1.647                                  | 0.0224429 | 5.740       | 0.0085197 | 1.055                              | 0.5886226 | 2.015       | 0.0570722 |
| <i>Ripk2</i>     | XM_342810    | 2.737                   | 0.0000236 | 0.795                                  | 0.3761186 | 1.528       | 0.1140157 | 0.821                              | 0.1079924 | 0.639       | 0.0077191 |
| <i>Sphk2</i>     | NM_001012066 | 1.569                   | 0.0532055 | 0.750                                  | 0.3048056 | 1.217       | 0.6133062 | 0.774                              | 0.1497402 | 0.798       | 0.1797260 |
| <i>Tnf</i>       | NM_012675    | 1.006                   | 0.8747687 | 1.534                                  | 0.3692731 | 0.708       | 0.3683797 | 1.429                              | 0.6814486 | 1.577       | 0.3164771 |
| <i>Tnfrsf10b</i> | NM_001108873 | 1.089                   | 0.8162706 | 1.915                                  | 0.1878127 | 0.891       | 0.5551148 | 0.972                              | 0.7152231 | 1.194       | 0.4135156 |
| <i>Tnfrsf11b</i> | NM_012870    | 0.868                   | 0.9167994 | 7.637                                  | 0.0002704 | 1.339       | 0.5840474 | 6.242                              | 0.0003507 | 1.856       | 0.2811675 |
| <i>Tnfrsf1a</i>  | NM_013091    | 1.741                   | 0.0366190 | 4.714                                  | 0.0010418 | 2.107       | 0.0163061 | 1.861                              | 0.0101588 | 0.647       | 0.1630276 |
| <i>Tnfrsf1b</i>  | NM_130426    | 1.236                   | 0.3361461 | 2.884                                  | 0.0002015 | 2.738       | 0.0115667 | 1.504                              | 0.1621738 | 1.703       | 0.1177998 |
| <i>Tnfrsf10</i>  | NM_145681    | 1.489                   | 0.0640165 | 0.256                                  | 0.0121597 | 0.968       | 0.8367897 | 0.841                              | 0.6907212 | 0.846       | 0.7400348 |
| <i>Tnfrsf12</i>  | NM_001001513 | 1.330                   | 0.0526604 | 0.785                                  | 0.2363447 | 1.715       | 0.0245183 | 0.649                              | 0.0401609 | 0.861       | 0.4840473 |
| <i>Tip53</i>     | NM_030989    | 1.823                   | 0.0034677 | 1.580                                  | 0.0876470 | 1.245       | 0.2873340 | 1.355                              | 0.0876393 | 0.709       | 0.2333269 |
| <i>Tip53bp2</i>  | XM_223012    | 1.138                   | 0.1321477 | 0.533                                  | 0.0030354 | 0.841       | 0.1430013 | 0.723                              | 0.0012144 | 0.790       | 0.0123704 |
| <i>Tip63</i>     | NM_019221    | 5.347                   | 0.0001305 | 0.964                                  | 0.9520080 | 1.230       | 0.2933686 | 0.902                              | 0.5167838 | 0.611       | 0.0824541 |
| <i>Tip73</i>     | NM_001108696 | 1.103                   | 0.8426040 | 0.976                                  | 0.8519256 | 0.639       | 0.3114931 | 0.953                              | 0.7106299 | 1.127       | 0.4193053 |
| <i>Tradd</i>     | NM_001100480 | 1.415                   | 0.0729792 | 0.956                                  | 0.6839678 | 2.127       | 0.0134618 |                                    |           |             |           |



|                  | Young  |       | Old    |       | Fold change |      |
|------------------|--------|-------|--------|-------|-------------|------|
|                  | Mean   | SE    | Mean   | SE    | Mean        | SE   |
| <i>Bax</i>       | 0.33%  | 0.25% | 0.81%  | 0.21% | 2.47        | 0.63 |
| <i>Bcl2l1</i>    | 0.88%  | 0.32% | 2.04%  | 0.55% | 2.31        | 0.62 |
| <i>Bcl2l11</i>   | 0.18%  | 0.05% | 0.23%  | 0.07% | 1.28        | 0.40 |
| <i>Bclaf1</i>    | 1.51%  | 0.84% | 1.23%  | 0.28% | 0.82        | 0.19 |
| <i>Bid</i>       | 2.98%  | 0.69% | 2.58%  | 0.25% | 0.87        | 0.08 |
| <i>Bik</i>       | 0.11%  | 0.07% | 0.15%  | 0.08% | 1.37        | 0.75 |
| <i>Birc2</i>     | 0.68%  | 0.26% | 1.06%  | 0.26% | 1.55        | 0.37 |
| <i>Bnip3l</i>    | 1.59%  | 0.43% | 1.49%  | 0.35% | 0.94        | 0.22 |
| <i>Casp3</i>     | 1.08%  | 0.43% | 1.01%  | 0.20% | 0.94        | 0.18 |
| <i>Casp9</i>     | 2.66%  | 0.70% | 2.37%  | 0.40% | 0.89        | 0.15 |
| <i>Cideb</i>     | 1.08%  | 0.48% | 1.07%  | 0.25% | 1.00        | 0.23 |
| <i>Cradd</i>     | 0.20%  | 0.07% | 0.17%  | 0.04% | 0.85        | 0.23 |
| <i>Dapk1</i>     | 0.12%  | 0.08% | 0.27%  | 0.11% | 2.38        | 0.94 |
| <i>Dffa</i>      | 13.33% | 2.10% | 11.64% | 1.28% | 0.87        | 0.10 |
| <i>Fadd</i>      | 1.85%  | 0.91% | 1.88%  | 0.53% | 1.01        | 0.29 |
| <i>Gadd45a</i>   | 2.53%  | 0.91% | 2.36%  | 0.37% | 0.93        | 0.15 |
| <i>Hrk</i>       | 0.86%  | 0.16% | 2.87%  | 1.03% | 3.34        | 1.20 |
| <i>Tnfrsf10b</i> | 0.38%  | 0.10% | 0.34%  | 0.12% | 0.89        | 0.32 |
| <i>Tnfrs21</i>   | 0.05%  | 0.02% | 0.04%  | 0.01% | 0.79        | 0.19 |
| <i>Tp53</i>      | 0.11%  | 0.06% | 0.09%  | 0.08% | 0.76        | 0.67 |

Table S3. Percent methylation of genes relevant to stress response for non-exposed muscles of young and old rats. Fold change calculated as old value divided by young value. Sample sizes of  $N = 9$  to  $12$  per value.



|                  | 6 hours     |       |         |       |             |      | 120 hours   |       |         |       |             |      |
|------------------|-------------|-------|---------|-------|-------------|------|-------------|-------|---------|-------|-------------|------|
|                  | Non-exposed |       | Exposed |       | Fold change |      | Non-exposed |       | Exposed |       | Fold change |      |
|                  | Mean        | SE    | Mean    | SE    | Mean        | SE   | Mean        | SE    | Mean    | SE    | Mean        | SE   |
| <i>Bax</i>       | 0.03%       | 0.01% | 0.57%   | 0.18% | 19.81       | 6.19 | 0.63%       | 0.50% | 0.45%   | 0.21% | 0.72        | 0.34 |
| <i>Bcl2l1</i>    | 1.17%       | 0.59% | 2.31%   | 0.99% | 1.97        | 0.84 | 0.59%       | 0.24% | 0.34%   | 0.12% | 0.57        | 0.20 |
| <i>Bcl2l11</i>   | 0.14%       | 0.05% | 0.14%   | 0.05% | 0.97        | 0.32 | 0.22%       | 0.08% | 0.22%   | 0.05% | 1.00        | 0.24 |
| <i>Bclaf1</i>    | 1.70%       | 1.61% | 2.24%   | 1.32% | 1.32        | 0.77 | 1.32%       | 0.74% | 0.20%   | 0.14% | 0.15        | 0.11 |
| <i>Bid</i>       | 3.14%       | 0.89% | 3.51%   | 1.10% | 1.12        | 0.35 | 2.83%       | 1.16% | 2.51%   | 0.75% | 0.89        | 0.26 |
| <i>Bik</i>       | 0.19%       | 0.14% | 0.73%   | 0.69% | 3.79        | 3.61 | 0.02%       | 0.01% | 0.03%   | 0.02% | 1.32        | 0.71 |
| <i>Birc2</i>     | 0.75%       | 0.47% | 1.08%   | 0.61% | 1.44        | 0.82 | 0.61%       | 0.30% | 0.38%   | 0.15% | 0.61        | 0.24 |
| <i>Bnip3l</i>    | 1.45%       | 0.49% | 2.56%   | 1.12% | 1.77        | 0.78 | 1.74%       | 0.75% | 0.34%   | 0.09% | 0.20        | 0.05 |
| <i>Casp3</i>     | 1.15%       | 0.77% | 1.50%   | 0.59% | 1.31        | 0.51 | 1.01%       | 0.49% | 0.76%   | 0.28% | 0.76        | 0.28 |
| <i>Casp9</i>     | 2.97%       | 1.38% | 3.28%   | 1.28% | 1.11        | 0.43 | 2.35%       | 0.49% | 1.57%   | 0.52% | 0.67        | 0.22 |
| <i>Cideb</i>     | 1.01%       | 0.85% | 1.74%   | 0.97% | 1.72        | 0.97 | 1.16%       | 0.44% | 0.59%   | 0.30% | 0.51        | 0.26 |
| <i>Cradd</i>     | 0.10%       | 0.04% | 0.21%   | 0.10% | 2.08        | 0.98 | 0.29%       | 0.12% | 0.08%   | 0.04% | 0.28        | 0.13 |
| <i>Dapk1</i>     | 0.04%       | 0.03% | 0.08%   | 0.06% | 1.83        | 1.31 | 0.19%       | 0.16% | 0.21%   | 0.07% | 1.15        | 0.38 |
| <i>Dffa</i>      | 13.29%      | 3.42% | 13.72%  | 2.49% | 1.03        | 0.19 | 13.37%      | 2.84% | 10.97%  | 1.16% | 0.82        | 0.09 |
| <i>Fadd</i>      | 2.10%       | 1.74% | 2.81%   | 1.30% | 1.34        | 0.62 | 1.60%       | 0.81% | 0.61%   | 0.16% | 0.38        | 0.10 |
| <i>Gadd45a</i>   | 2.52%       | 1.78% | 3.04%   | 1.15% | 1.21        | 0.46 | 2.53%       | 0.75% | 1.00%   | 0.33% | 0.39        | 0.13 |
| <i>Hrk</i>       | 0.74%       | 0.19% | 1.57%   | 0.94% | 2.13        | 1.28 | 1.01%       | 0.32% | 1.10%   | 0.19% | 1.09        | 0.19 |
| <i>Tnfrsf10b</i> | 0.38%       | 0.18% | 0.75%   | 0.43% | 1.98        | 1.13 | 0.39%       | 0.12% | 0.13%   | 0.11% | 0.32        | 0.27 |
| <i>Tnfrsf21</i>  | 0.06%       | 0.04% | 0.08%   | 0.04% | 1.35        | 0.66 | 0.04%       | 0.01% | 0.03%   | 0.01% | 0.77        | 0.16 |
| <i>Tp53</i>      | 0.10%       | 0.05% | 0.21%   | 0.20% | 2.04        | 1.95 | 0.15%       | 0.14% | 0.01%   | 0.00% | 0.09        | 0.01 |

Table S4. Percent methylation of genes relevant to stress response for SSC-exposed and non-exposed muscles of young rats. Fold change calculated as exposed value divided by non-exposed value. Sample sizes of  $N = 4$  to 6 per value.

|                  | 6 hours     |       |         |       |             |       | 120 hours   |       |         |       |             |      |
|------------------|-------------|-------|---------|-------|-------------|-------|-------------|-------|---------|-------|-------------|------|
|                  | Non-exposed |       | Exposed |       | Fold change |       | Non-exposed |       | Exposed |       | Fold change |      |
|                  | Mean        | SE    | Mean    | SE    | Mean        | SE    | Mean        | SE    | Mean    | SE    | Mean        | SE   |
| <i>Bax</i>       | 0.51%       | 0.22% | 0.51%   | 0.15% | 0.99        | 0.29  | 1.10%       | 0.32% | 1.58%   | 0.54% | 1.43        | 0.49 |
| <i>Bcl2l1</i>    | 1.93%       | 0.44% | 2.00%   | 0.85% | 1.04        | 0.44  | 2.14%       | 1.06% | 1.36%   | 0.96% | 0.64        | 0.45 |
| <i>Bcl2l11</i>   | 0.21%       | 0.14% | 0.18%   | 0.09% | 0.89        | 0.41  | 0.26%       | 0.07% | 0.16%   | 0.03% | 0.61        | 0.12 |
| <i>Bclaf1</i>    | 1.74%       | 0.22% | 2.42%   | 1.24% | 1.39        | 0.71  | 0.73%       | 0.44% | 1.03%   | 0.52% | 1.42        | 0.71 |
| <i>Bid</i>       | 2.43%       | 0.33% | 3.08%   | 0.80% | 1.27        | 0.33  | 2.74%       | 0.39% | 3.91%   | 0.83% | 1.43        | 0.30 |
| <i>Bik</i>       | 0.14%       | 0.13% | 0.92%   | 0.89% | 6.38        | 6.13  | 0.15%       | 0.11% | 0.07%   | 0.03% | 0.46        | 0.22 |
| <i>Birc2</i>     | 0.88%       | 0.31% | 0.63%   | 0.20% | 0.72        | 0.23  | 1.24%       | 0.42% | 0.98%   | 0.36% | 0.79        | 0.29 |
| <i>Bnip3l</i>    | 1.57%       | 0.40% | 2.85%   | 0.91% | 1.81        | 0.58  | 1.42%       | 0.61% | 1.23%   | 0.42% | 0.87        | 0.30 |
| <i>Casp3</i>     | 0.74%       | 0.22% | 1.33%   | 0.46% | 1.80        | 0.62  | 1.29%       | 0.30% | 1.27%   | 0.42% | 0.98        | 0.32 |
| <i>Casp9</i>     | 2.31%       | 0.53% | 2.98%   | 0.64% | 1.29        | 0.28  | 2.43%       | 0.66% | 2.11%   | 0.45% | 0.87        | 0.19 |
| <i>Cideb</i>     | 0.83%       | 0.20% | 2.24%   | 0.76% | 2.71        | 0.91  | 1.32%       | 0.46% | 1.09%   | 0.45% | 0.83        | 0.34 |
| <i>Cradd</i>     | 0.11%       | 0.07% | 0.19%   | 0.11% | 1.63        | 0.97  | 0.22%       | 0.05% | 0.24%   | 0.11% | 1.11        | 0.49 |
| <i>Dapk1</i>     | 0.14%       | 0.11% | 0.21%   | 0.13% | 1.45        | 0.90  | 0.41%       | 0.18% | 0.49%   | 0.20% | 1.20        | 0.50 |
| <i>Dffa</i>      | 10.23%      | 1.32% | 11.03%  | 1.58% | 1.08        | 0.15  | 13.05%      | 2.15% | 9.95%   | 1.91% | 0.76        | 0.15 |
| <i>Fadd</i>      | 1.68%       | 0.23% | 2.77%   | 1.31% | 1.65        | 0.78  | 2.07%       | 1.08% | 1.87%   | 0.48% | 0.90        | 0.23 |
| <i>Gadd45a</i>   | 2.20%       | 0.35% | 2.81%   | 0.71% | 1.28        | 0.32  | 2.51%       | 0.68% | 2.31%   | 0.73% | 0.92        | 0.29 |
| <i>Hrk</i>       | 2.58%       | 1.88% | 0.46%   | 0.13% | 0.15        | 0.04  | 2.73%       | 0.73% | 1.75%   | 0.28% | 0.64        | 0.10 |
| <i>Tnfrsf10b</i> | 0.34%       | 0.10% | 0.77%   | 0.44% | 2.26        | 1.30  | 0.34%       | 0.23% | 0.69%   | 0.29% | 2.01        | 0.86 |
| <i>Tnfrsf21</i>  | 0.02%       | 0.01% | 0.02%   | 0.00% | 0.71        | 0.18  | 0.06%       | 0.02% | 0.06%   | 0.01% | 0.98        | 0.22 |
| <i>Tp53</i>      | 0.01%       | 0.00% | 0.47%   | 0.31% | 57.09       | 37.50 | 0.16%       | 0.15% | 0.01%   | 0.00% | 0.07        | 0.01 |

Table S5. Percent methylation of genes relevant to stress response for SSC-exposed and non-exposed muscles of old rats. Fold change calculated as exposed value divided by non-exposed value. Sample sizes of  $N = 6$  per value.
